# Supplementary material for: Gastric cancer specific drug delivery with hydrophilic peptide probe conjugation
Source: Royal Society of Chemistry journal article supplement (doi:10.1039/d3bm01590d), 2023-11-21

# Supplementary Figure 1

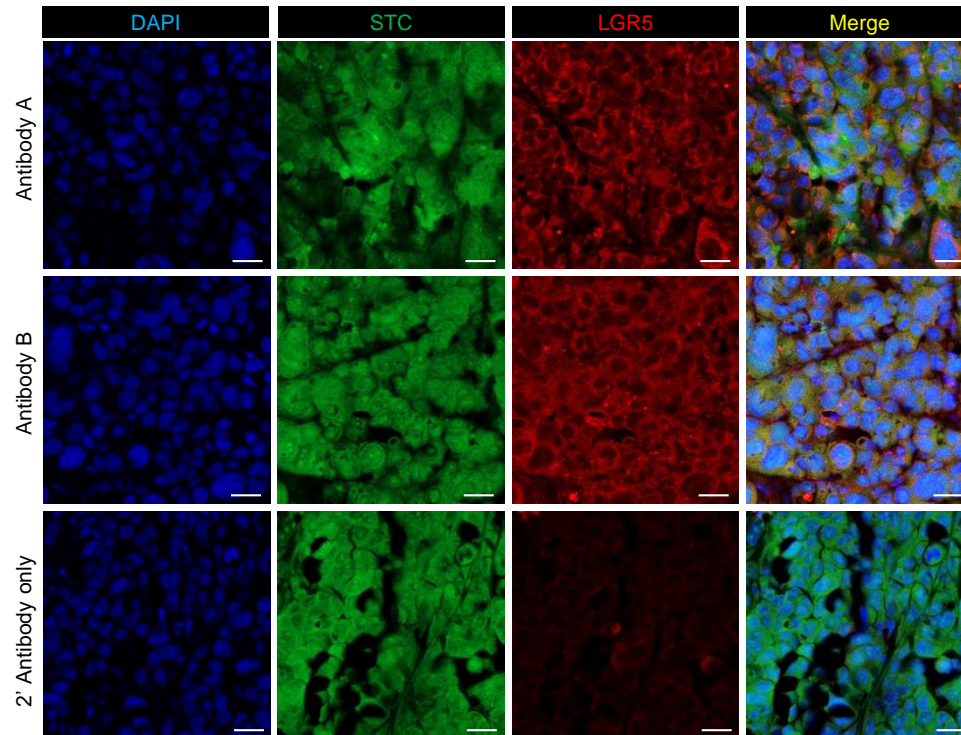

# Supplementary Figure 2

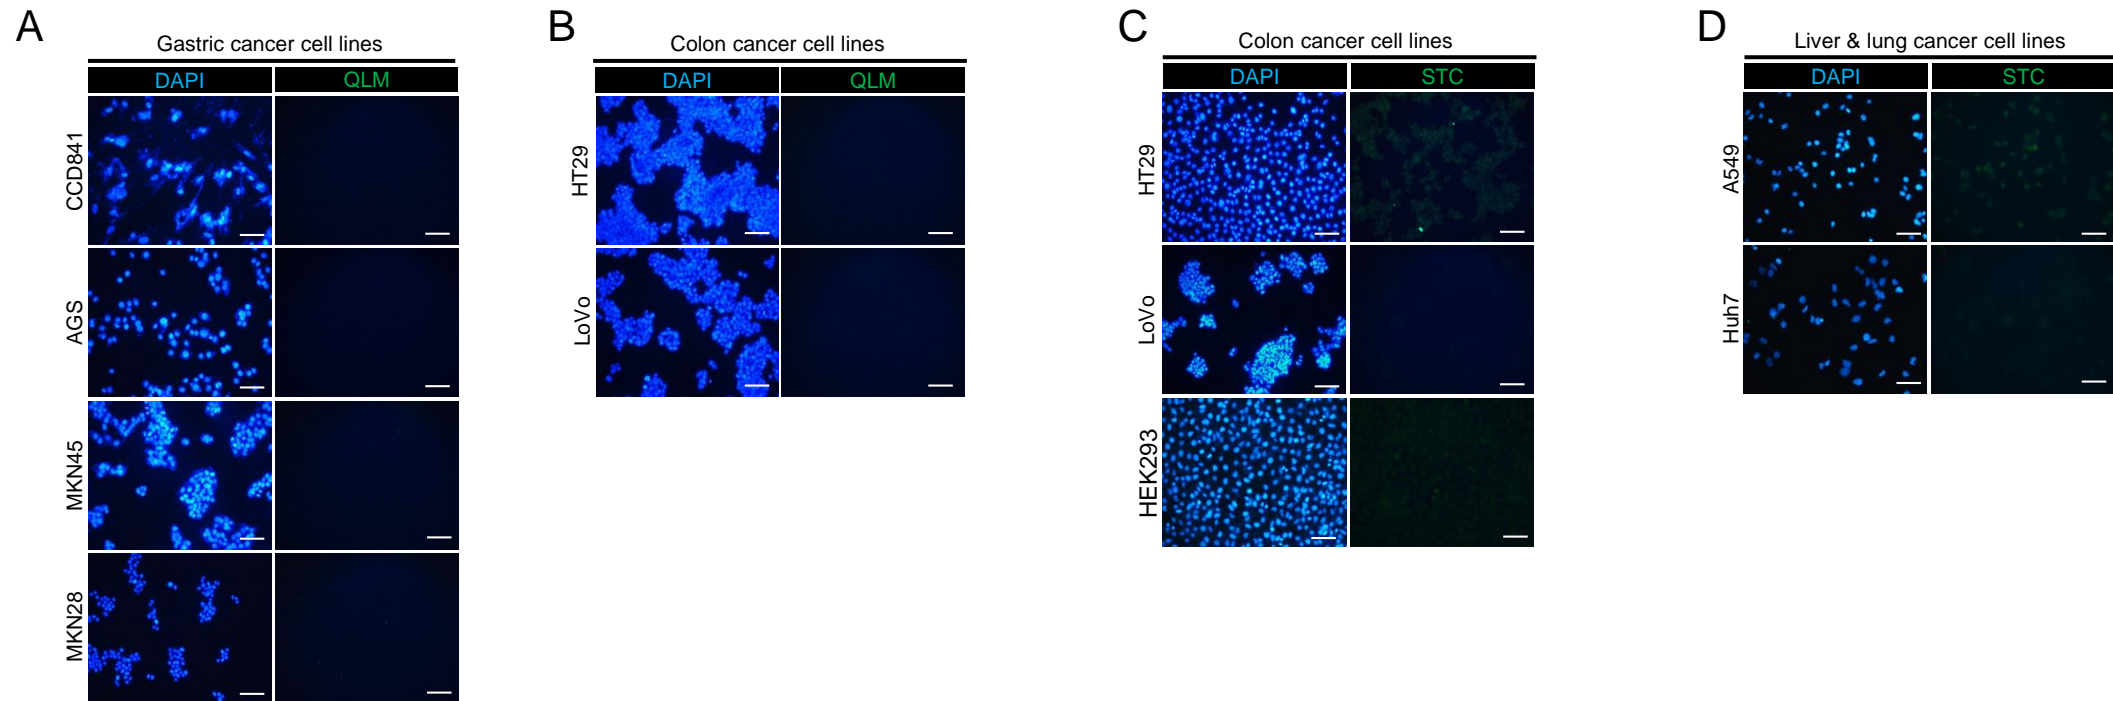

# Supplementary Figure 3

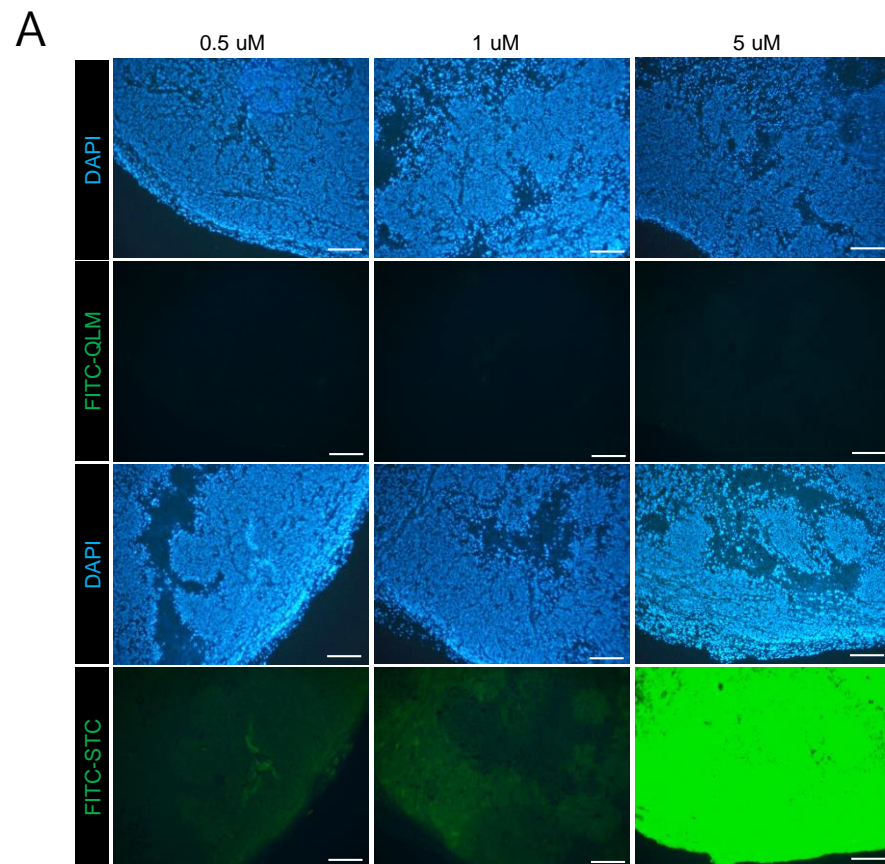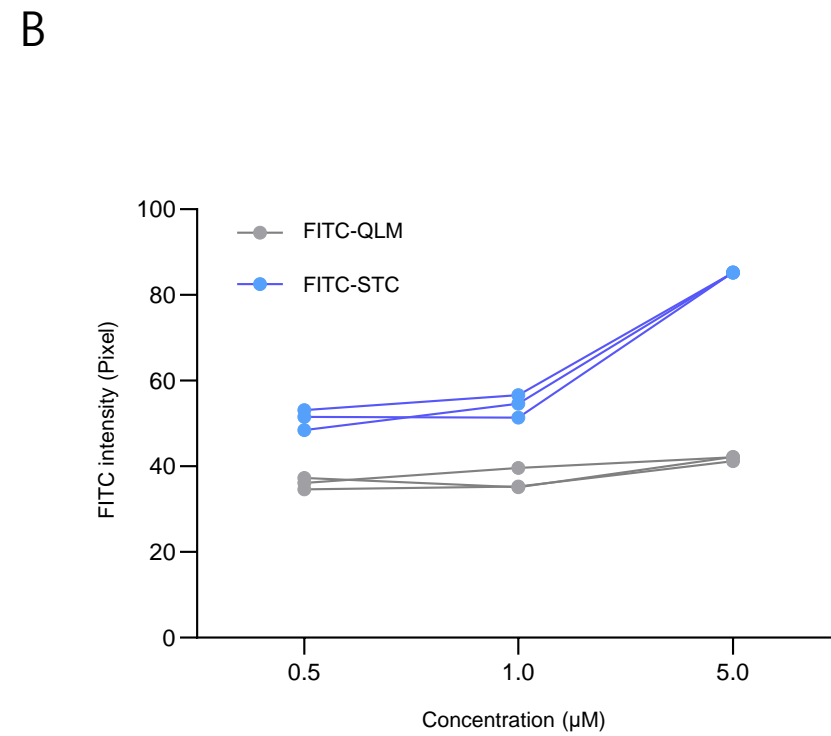

# Supplementary Figure 4

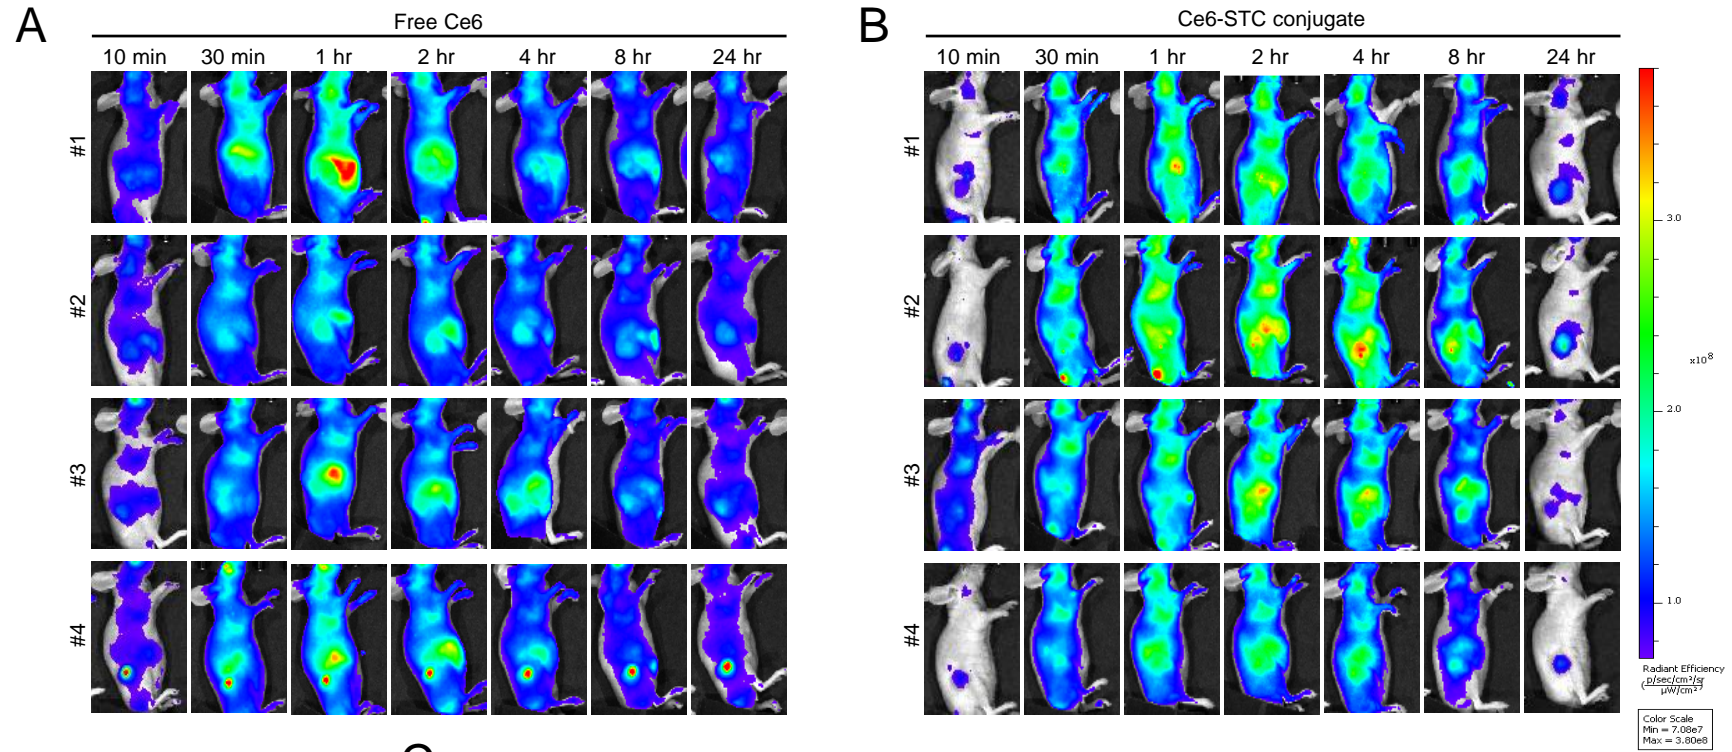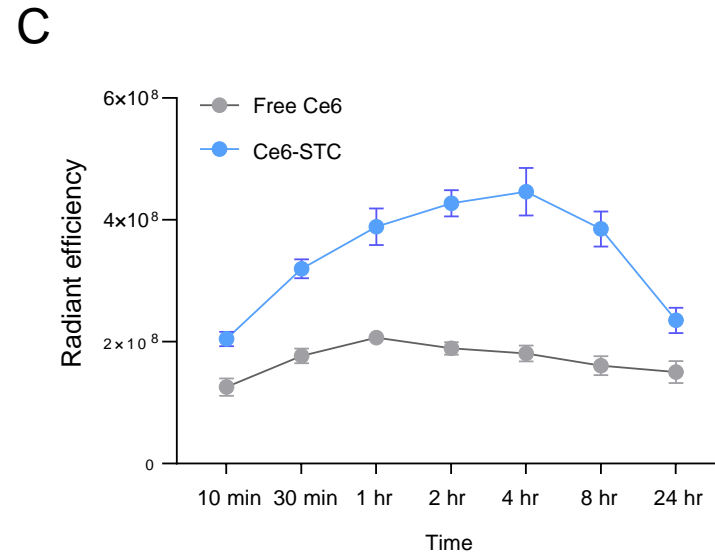

# Supplementary Figure 5

A

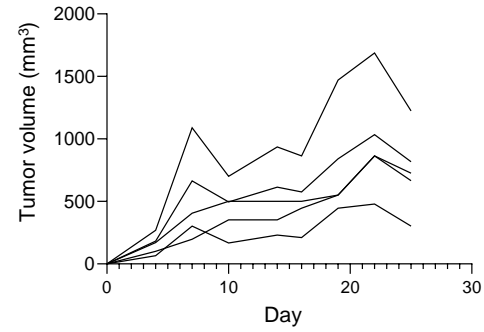

B

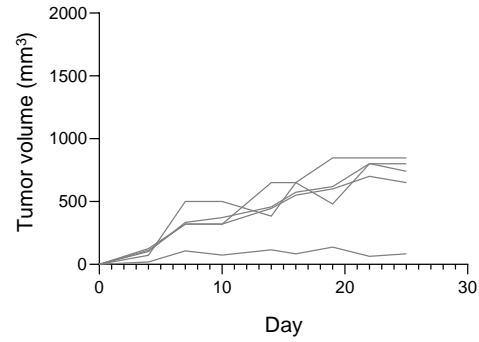

C

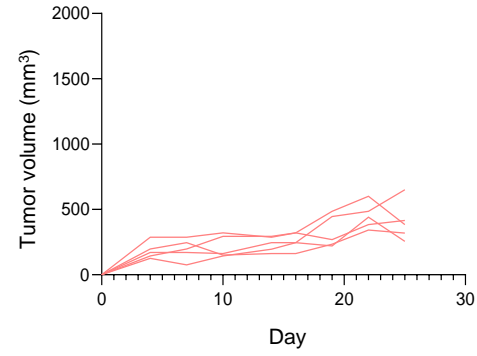

D

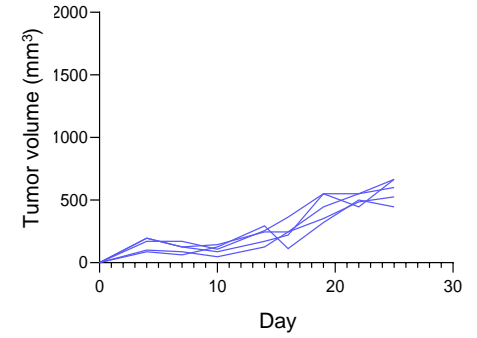

E

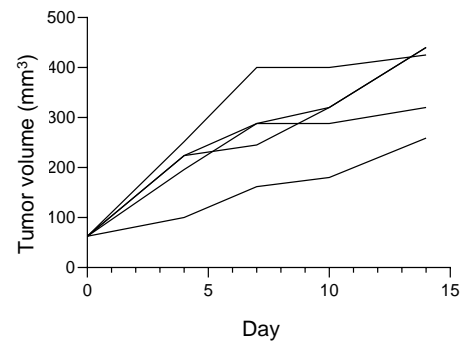

F

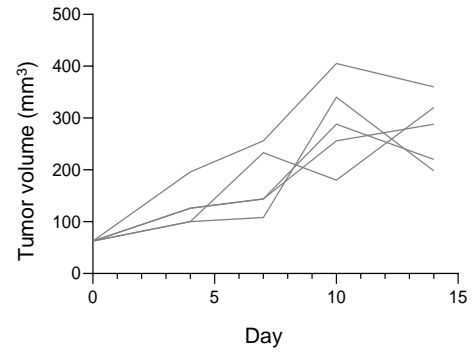

G

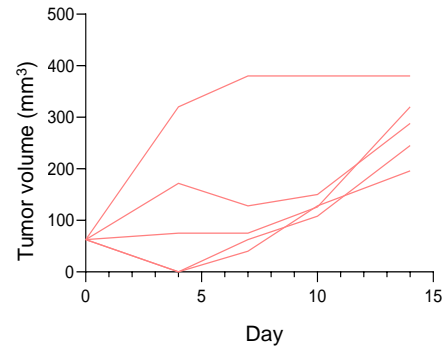

H

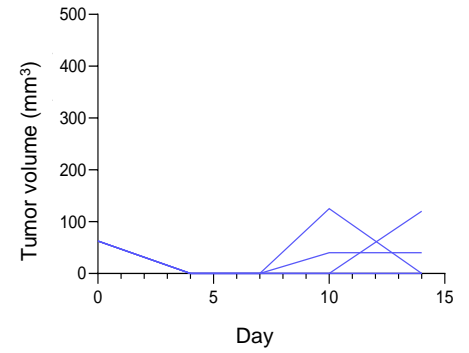

# Supplementary Figure 6

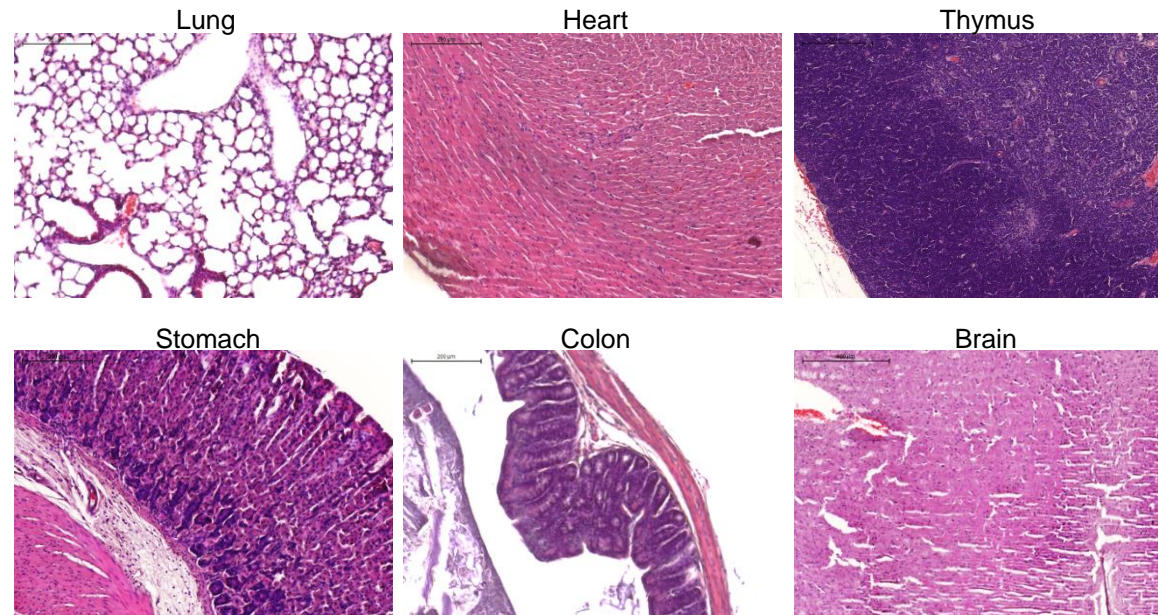

Supplement: d3bm01590d1.pdf [file d3bm01590d1.pdf]
